# Supplementary material for: Genomic Characterization of the Historical Smallpox Vaccine Strain Wyeth Isolated from a 1971 Seed Vial
Source: MDPI journal article supplement (doi:10.3390/v15010083), 2022-12-28
Supplement: s1 [file s1]

**Table S1. Major ORF differences between Wyeth clones A211 and A311 in relation to clone A111**

| Wyeth clones | ORFs in Wyeth genome <sup>a</sup> |                     |                                                                                                         |
|--------------|-----------------------------------|---------------------|---------------------------------------------------------------------------------------------------------|
|              | Present <sup>a</sup>              | Absent <sup>a</sup> | Product (ortholog of VACV-Cop)                                                                          |
| A211         | 036.1                             |                     | Fragment of C4L. NFκB inhibitor. Different patterns of fragmentation in A111, A211, and A311            |
|              | 042.1                             |                     | Fragment of M1L. Apoptosis inhibitor. Intact ORF in clone A111                                          |
|              |                                   | 074                 | Fragment of E5R. Virosome component. Intact ORF in clone A211 and A311, but fragmented in A111          |
|              |                                   | 181                 | Fragment of A39R. Semaphorin-like protein. Different patterns of fragmentation in A111, A211, and A311  |
| A311         |                                   | 024                 | Fragment of 77 kDa cowpox host-range gene. Different patterns of fragmentation in A111, A211, and A311. |
|              | 042.1                             |                     | Fragment of M1L. Apoptosis inhibitor. Intact ORF in clone A111                                          |
|              |                                   | 074                 | Fragment of E5R. Virosome component. Intact ORF in clone A211 and A311, but fragmented in A111          |
|              |                                   | 181                 | Fragment of A39R. Semaphorin-like protein. Different patterns of fragmentation in A111, A211, and A311  |
|              |                                   | 228                 | Fragment of 77 kDa cowpox host-range gene. Different patterns of fragmentation in A111, A211, and A311. |

<sup>a</sup>ORF number is indicated.
