# Supplementary material for: Genomic Characterization of the Historical Smallpox Vaccine Strain Wyeth Isolated from a 1971 Seed Vial
Source: MDPI journal article supplement (doi:10.3390/v15010083), 2022-12-28
Supplement: s1 [file s1]

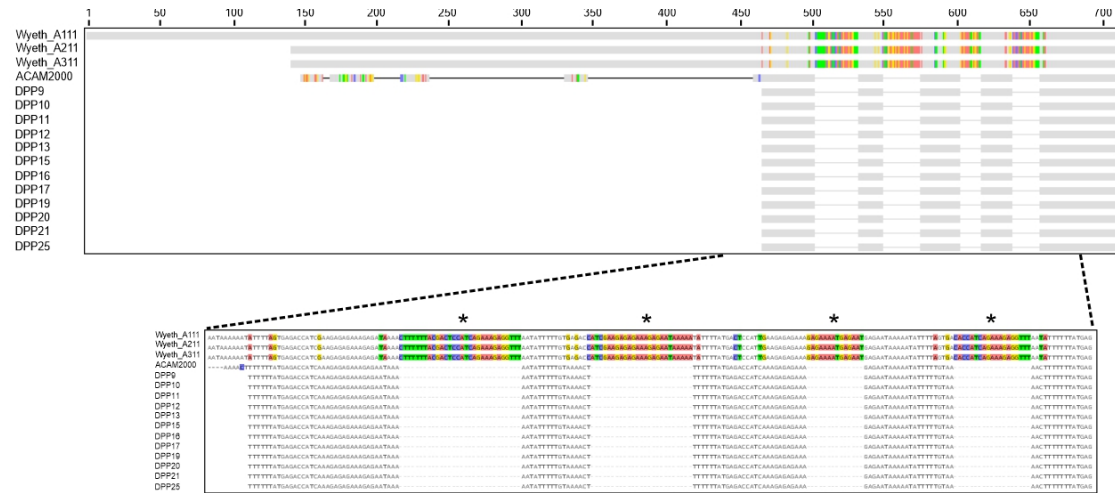

**Figure S1.** Insertions in the genome ends of VACV-Wyeth clones. The left end of a multialignment of Dryvax and VACV-Wyeth genomes was analyzed in Geneious Prime 2022.2.2. Four insertions present only in VACV-Wyeth genomes are highlighted in color (top panel) and indicated with asterisks in the bottom panel, which shows a zoomed-in inspection of the region.
